# Supplementary material
Source: HighWire-hosted journal article supplement (https://thorax.bmj.com/content/72/4/355)
Supplement: inline-supplementary-material-1 [file inline-supplementary-material-1.pdf]

## Appendix 1: Search terms used

### EMBASE (Ovid)

HIV.mp OR Human Immunodeficiency Virus OR Acquired Immunodeficiency Syndrome  
AND (Wheezing or coughing or dyspn?ea or h?emoptysis).mp

### MEDLINE (Ovid)

Exp "signs and symptoms respiratory"/ OR (signs and symptoms, respiratory).mp  
OR (cough\$ or breathless\$ or dyspn?ea or h?emoptysis or (short\$ adj2 breath)).mp  
AND Exp HIV OR Exp HIV Infections OR (HIV or human adj immunodeficiency adj virus) or  
acquired adj immunodeficiency adj syndrome).mp

### CINAHL (EBSCO)

(MH "Human Immunodeficiency Virus+" OR MH ("Acquired Immunodeficiency Syndrome")  
OR MH "HIV Infections+") OR (MH "HIV Infected Patients+") OR ((HIV) OR (human  
immunodeficiency virus) OR (AIDS) OR (Acquired Immunodeficiency Syndrome)) AND ((MH  
"Signs and symptoms, Respiratory (Non-CINAHL)+") OR "Cough" OR "Dyspn?ea" OR  
"h?emoptysis" OR "short\*adj2 breath")
